# Supplementary material
Source: PubMed Central journal article supplement (PMC5720375)
Supplement: NIHMS898418-supplement-supplement_1.pdf [file NIHMS898418-supplement-supplement_1.pdf]

1146 **Supporting Information**

1147 **FIGURE S1**

1148 **Sequence alignment of *C. albicans* members of the Rta family by CLUSTAL OMEGA.**

1149 The black boxes indicate identical residues, whereas grey boxes indicate similar residues that are  
 1150 present when three or more sequences are compared. The TMHMM program  
 1151 predicts the presence of up to seven TMDs. The red box between TMS6 and TMS7 represents  
 1152 the His-Glu-Tyr/Trp motif within a 28 amino acid stretch, considered as the signature motif of  
 1153 the Rta1-like family of proteins.

1154

1155 **FIGURE S2**

1156 **Disruption of *RTA3* using the *SAT* flipper strategy.**

1157 (a) Schematic representation of disruption strategy. (b) *RTA3* reconstitution construct used to  
 1158 integrate *RTA3* in the *rta3Δ/Δ* cells. (c) Southern hybridization showing genomic configuration  
 1159 of *RTA3* in the wild-type (WT) locus and its deletion derivatives. Genomic DNA from strains  
 1160 was digested with BglII. Lane 1, wild type (SC5314); lane 2, *RTA3/rta3Δ::SAT1-FLIP*; lane 2,  
 1161 *RTA3/rta3Δ::FRT*; lane 3, *rta3Δ::SAT1-FLIP/rta3Δ::FRT*; lane 4, *rta3Δ::FRT/rta3Δ::FRT*; lane  
 1162 5, *rta3Δ::FRT/rta3Δ::RTA3-SAT1-FLIP*.

1163

1164 **FIGURE S3**

1165 **NBD-PC is trafficked to the vacuole in *S. cerevisiae* and is concentrated in the**  
 1166 **mitochondria in *C. albicans*.**

1167 (a) Wild type strains of *S. cerevisiae* (BY4741) and *C. albicans* (SC5314) were grown to an  
 1168 OD<sub>600</sub> of 1, labelled with 5 μM NBD-PC for 45 min at 30 °C, followed by washing twice with  
 1169 SDC. Cells were kept in fresh SDC media at 30 °C and labeled with FM4-64 (40 μM) for 30  
 1170 min, washed with ice cold SC-azide three times. Cells were centrifuged, resuspended in ice cold  
 1171 SC-azide and visualized by confocal microscopy. (b) *C. albicans* wild type strain (SC5314) was

1172 grown to an OD<sub>600</sub> of 1, labelled with 5 µM NBD-PC and co-stained with 20 nM MitoTracker™  
1173 Red (MTR) for the indicated time points at 30 °C. At the indicated time points, aliquots of cells  
1174 were removed and washed with ice cold SC-azide three times and visualized by confocal  
1175 microscopy. Values on the right indicate mean fluorescence intensity (MFI) of NBD-PC in all  
1176 strains measured by flow cytometry. Data represents the mean ± S.D of three independent  
1177 experiments. m denotes mitochondria.

1178

#### 1179 **FIGURE S4**

##### 1180 **NBD-PC labels mitochondria at low temperature in *C. albicans***

1181 Wild type strain grown to an OD<sub>600</sub> of 1 was stained with 20 nM MitoTracker™ Red (MTR) at  
1182 30 °C for 45 min, washed twice with SDC and resuspended in fresh SDC. Cells were then  
1183 chilled on ice bath followed by labelling with 5 µM NBD-PC for 45 min at 2 °C and chased for  
1184 30 min at 30 °C. At the indicated time points, aliquots were removed and washed with ice cold  
1185 SC-azide and visualized by confocal microscopy. Values on the right indicate mean fluorescence  
1186 intensity (MFI) of NBD-PC in all strains measured by flow cytometry. Data represents the mean  
1187 ± S.D of three independent experiments. m denotes mitochondria.

1188

#### 1189 **FIGURE S5**

##### 1190 **Internalization assays for NBD-PC/PE and apparent flippase activity.**

1191 (a) Cells untreated or treated with 50 µM CCCP were labelled at 2 °C with DMSO solubilized  
1192 NBD-PC, washed with cold SC-azide and were subjected to imaging by confocal microscopy.  
1193 (b) Wild type and *rta3Δ/Δ* cells were labelled with 5 µM of DMSO solubilized NBD-labelled  
1194 PE. Strains were grown till OD<sub>600</sub> of 1, incubated with NBD-PE for 45 min at 30 °C in SDC  
1195 medium and washed with SDC. Samples were then incubated in SDC medium at 30 °C for 30  
1196 min, washed with ice cold SC-azide and visualized by confocal microscopy. Values on the right

1197 indicate mean±S.D (n=3) fluorescence measurements by flow cytometry. (c) Flow cytometric  
1198 analysis of the apparent flippase activity on the indicated strains by using 2 μM NBD-PE and the  
1199 impermeant quencher sodium dithionite. The internalized PE is represented as the percentile  
1200 dithionite-resistant NBD-PE fluorescence from total NBD-PE fluorescence.

1201

## 1202 **FIGURE S6**

### 1203 **In vitro biofilm formation**

1204 (a) *In vitro* biofilm assays were carried out in Spider medium by growing the biofilm directly on  
1205 the bottom on the 96 well polystyrene plates, as described previously (Fox *et al.*, 2015, Lohse *et*  
1206 *al.*, 2017). Briefly, strains were grown overnight in YEPD at 30 °C for 12-14 h and diluted to an  
1207 optical density at OD<sub>600</sub> of 0.5 in 200 μl Spider medium. The inoculated plate was covered with  
1208 a breathable film and incubated at 37°C for 90 min at 250 rpm agitation on an ELMI incubator  
1209 (ELMI, Ltd. Riga, Latvia) for initial adhesion of cells. Post adhesion, the cells were washed with  
1210 200 μL 1X PBS, and 200 μl of fresh Spider medium was added. The plate was covered with a  
1211 fresh breathable film and incubated at 37 °C for an additional 24 h at 250 rpm agitation to allow  
1212 for biofilm formation. Following incubation, the film and medium were removed and the OD<sub>600</sub>  
1213 was measured using a standard plate reader to determine the extent of biofilm formation. A well  
1214 containing medium alone was included as a contamination control. Statistical significance (*P*  
1215 values) was calculated using a Student's one-tailed paired t-test. *P* values are as follows: n.s is  
1216 not significant, \*\* < 0.005 and \*\*\* < 0.0005. (b) Visual *in vitro* biofilm assays were carried out  
1217 in Spider medium by growing the biofilm on silicone squares in 6-well plates, as described in  
1218 Nobile *et al.*, 2012. A silicone square in a well containing medium alone was included as a  
1219 contamination control. (c) qPCR based expression analysis of selected genes in the indicated  
1220 strains. Fold change is calculated by  $2^{-\Delta\Delta CT}$  and normalized to *ACT1* (endogenous control) with

1221 the reference strain as a calibrator. Values are mean  $\pm$  S.D and are derived from three  
1222 independent experiments.

1223

1224 **FIGURE S7**

1225 **Flow cytometric analysis for measuring mitochondrial membrane potential.**

1226 Wild type cells grown to OD<sub>600</sub> of 1 were treated with 50  $\mu$ M CCCP for 30 min and 5  $\mu$ g ml<sup>-1</sup>  
1227 miltefosine for 60 min, washed three times with 1X PBS and stained with 2 nM DiOC<sub>6</sub>(3). The  
1228 stained cells were subjected to flow cytometric analysis. The drug treated wild type cells display  
1229 greater percentage of cells with depolarized mitochondria (left quadrant), versus untreated wild  
1230 type cells.

1231

1232 **TABLE S1** *C. albicans* strains used in this study

1233 **TABLE S2** Plasmid used in this study

1234 **TABLE S3** Oligonucleotides used in this study

1235 **TABLE S4** Oligonucleotides used for qPCR in this study

1236 **TABLE S5** List of 115 differentially expressed genes whose transcript levels in the *rta3 $\Delta$ / $\Delta$*   
1237 strain are 1.5-fold up- and down- regulated ( $P \leq 0.05$ )

1238

1239



## Figure S1

*scRSB1* 1 -----  
*CaRTA1* 1 MDGVSLLNQYLPSWTPSTLPTSTSIISTINPTNTAGLALTLLELQNAIQ---TETNTISLY  
*CaRTA2* 1 ---MSEILNLYLSSWTPSTPTSTTLSSIATSHVSKLSQTVASVISQAT---TETDWNLR  
*CaRTA3* 1 --MNTMDLAVITEWTPSTATSTTLSTIAATYAPALQSKI SGAVHTLTSKGSTIANMDYI  
*CaRTA4* 1 ----MDLASITEWTPTTPTSTTLSTIAATYVPALQSKLSNAIDTLTSKGSTIDIVDYI

*scRSB1* 1 -----MSNATNN-----TLGSLLP  
*CaRTA1* 58 FLSRAARGVAASYTIISGQQYLATATAT-----QDFPEVTSAMVNA-TL  
*CaRTA2* 55 SLSQAYRGAQASLTIISA EKVLATATDS-----QVQSRATQAI FEA-TL  
*CaRTA3* 59 SASRIIRGAQASLSIISA EHVLETATAT-----DVQAQATQIIWQA-TE  
*CaRTA4* 56 SVSRIIRGAQASLSIISAQQVLATATNINTATATATDVQLQAQIQQAQAIQIIWQA-TE

**TMS1** **TMS2**

*scRSB1* 15 QLEAAANSNSLYGGMVFNLRFNITMIVIWGILLTIHVV-QLLMROYWFSIAFICTGILEV  
*CaRTA1* 101 SLKQLEWKANLYAI-NLSVPFNAFFAAMFGVTLICLLGIGFSTKTKYFTICLACGTILEV  
*CaRTA2* 98 NLKDL SMEQNIYGY-ELNRAANIYLVVYAIIFGYTLLMCIKSKYWWYNVTFVCGYGLEF  
*CaRTA3* 102 NLLDLAWEENVYDIPRLNRTANILFLVLF AITFAIACLMWIKSRYWWFNVAWTCGTALEF  
*CaRTA4* 115 NLLDLAWEMNVYAI PKLNRVANILFLVIFAITFVMTCLMWIKSRYWWFNVS WTTCGTALEF

**TMS3**

*scRSB1* 74 LGFIGRTWSHSNVADMDAFLNMICLTIAPVFTMGGIYYQLAKLIEVYGHRFSLLPSPMA  
*CaRTA1* 160 IGYVARTLAHYSWSDPNLFLCQIVSLTVAPAFIMAGVYYLLSQMI I IHGEQYAIL-KPIM  
*CaRTA2* 157 VGFLGRVLSFNDTSNMSHYIMQSVALTIAPAFIMAGVYFLFGQLVVIHGRQYSVL-KPMW  
*CaRTA3* 162 LGYLGRVLSFS DMKKFDYLLQLIALT LSPVFLMAGIYFLFGQLVVIHGRQYSWL-KPLH  
*CaRTA4* 175 LGFLGRVLSFDDMTKFDYLLQLITLTLSPVFLMAGIYFLFGQLVVIHGRQYSML-KPLH

**TMS4** **TMS5**

*scRSB1* 134 YSFI FICS DIVSLV VQAVGGGLCGVAVTDGTS TTTGNHVF IAGLAIQVASMAIFLMLWFH  
*CaRTA1* 219 VSIIFIFCDVVS L FVQASGGAAA VSLRSFKDTELGTYIMVGGIGFQVVSMTLFLYFLFD  
*CaRTA2* 216 YSYFFITADVVSLLIQAGGGIASVASSNHKDS SVGTNIMIAGIAAQVVAMTIFLVWFE  
*CaRTA3* 221 YSYIFITCDVVS LVIQAVGGGMTAIAAQEYDDVDPGTYTMIAGIAFQVFSMSVFLCWL V  
*CaRTA4* 234 YSYIFITCDVVS L VVQAVGGGMTSIAAQRYENVDSGTYTMIAGIAFQVFSMSVFLTFWFV

*scRSB1* 194 FLFR IYISVRWEHIN-SRP--IS-----ISL-----LKISQTEVDYLYREKFHF LRL  
*CaRTA1* 279 FVYRSFFTANSN-----IKYSFSTYCSLLENTKKGRLL-RQDLEPFYDVG YKHIRQ  
*CaRTA2* 276 FLNRIYFKNSRSDLIVDCP-YGRRSISNYFKLLLN VKSVRGHRHTHLEKY YNEKFASIRQ  
*CaRTA3* 281 FCWNIYFRDISVNESKPS P-YQKKS FMTFIKLLLN GDDANMYKLKVL D KYN S SYKDLRR  
*CaRTA4* 294 FCWNIYFRDISVNESKPS SYQKKS LITFIKLLLN GDDANKYKLQVLDKHYNLGYQDLRG

**TMS6** **TMS7**

*scRSB1* 238 EPKRWFH YFNLAITVA VLTIFTRCCYRLAELVVGWDGYLITHEWYFIILDALMMAIATV  
*CaRTA1* 329 ---RSLFN YMPLVIIISVGF IYIRCIYRVIELSEGWRGYLITHEEYIFALDALMVLLTCI  
*CaRTA2* 335 ---IPLFDY MVLA MTI AVIVVYIRCVYRVAELAE GWGGYLF THEP YLMILDAAMIAIAGL  
*CaRTA3* 340 ---RPLYNYAIAITLAVIAVYIRCIYRVVELAQGFSGYLITHEVYIMTLDAAMIGICCI  
*CaRTA4* 354 ---RPLYNYAIAITSAVIAVYIRCVYRVVELAQGFRGYLITHEAYIMTLDAAMIAICCI

*scRSB1* 298 TLTIFHPGF AFKGRSTSIPI T-PGHVDPETLPHTDDVEDI----LDTS DSKQF-DIEKEE  
*CaRTA1* 386 TYVFFHPGLVFGKQMTAQISVSA-NKSESAADHESHCGNSRMYNYSKNHSNSPQSSHDEK  
*CaRTA2* 392 IFIPFHPVWVFGKNNIVKLATIKNLDENEKNQDVE-----Y--NDDVES--QERSS  
*CaRTA3* 397 IFILFHPQVVMGSSNVVGLRSIAKNKDQETGDKSYE-----EKTNNDIVS--DNEES  
*CaRTA4* 411 IFMLFHPQFVMG SINVI GFRSIAKNQDQEMGDTSTE-----VKTNEMKSL--V\*---

*scRSB1* 352 FQ--ASMK--YPI---STFKQFMSKIAN-----LFSSKKKAKL\*-----  
*CaRTA1* 445 FIMDQRQKY YNPYFLPTKFSQYN SHSCPSSETYTYSSYN SKLET KSESSWQNS\*  
*CaRTA2* 440 SVVANDIH-----CLNSKL\*-----  
*CaRTA3* 447 TLQGQNIVRGDP IQENKE\*-----  
*CaRTA4* -----

Figure S2

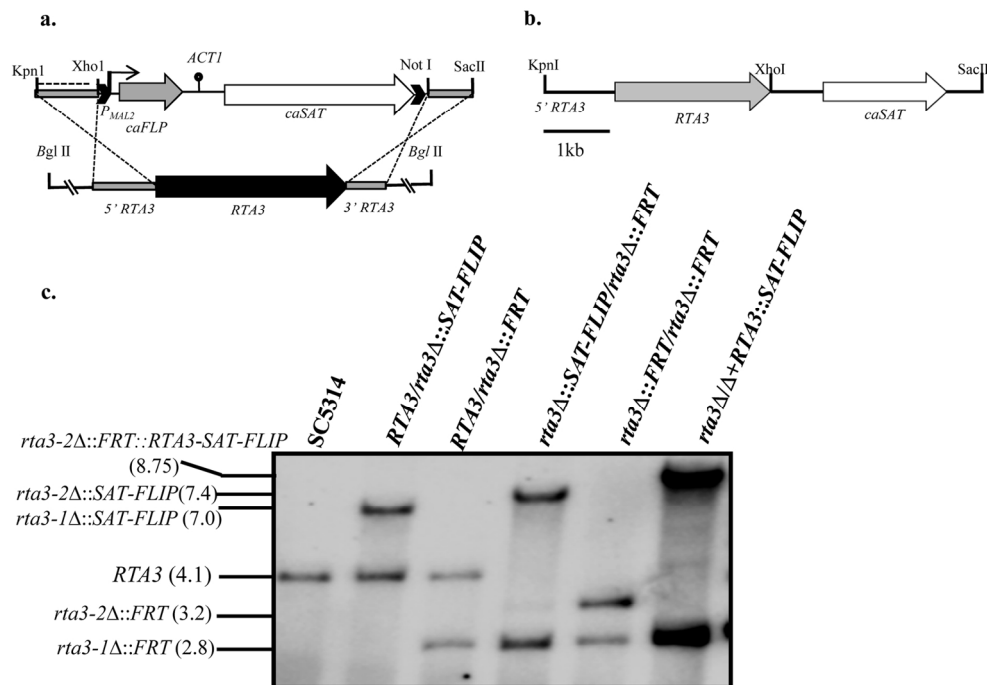

160x157mm (300 x 300 DPI)

Figure S3

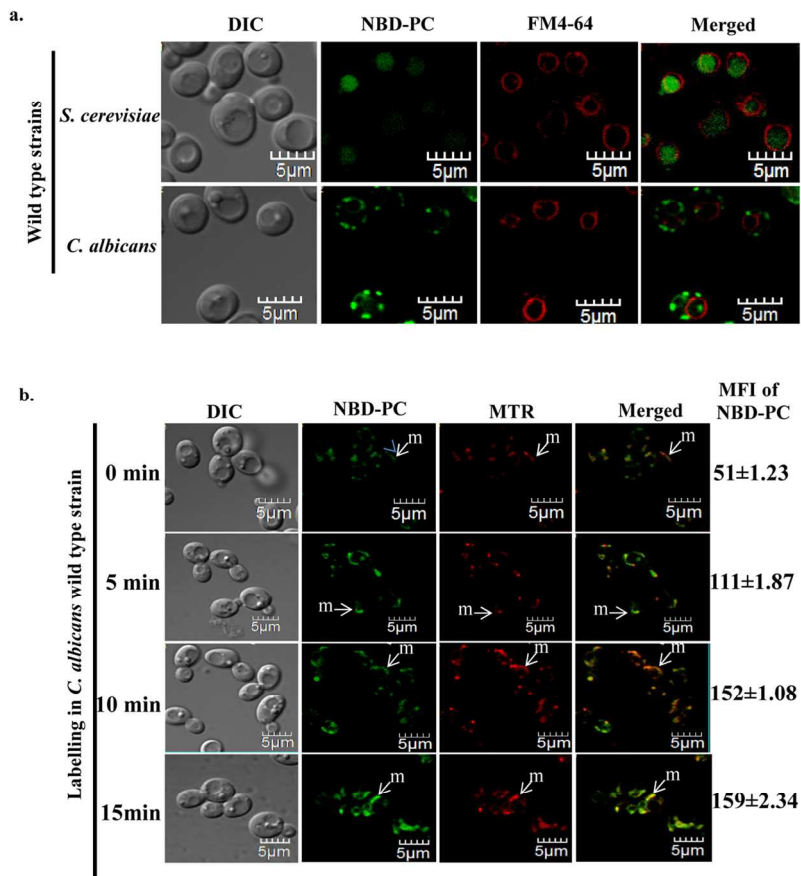

160x157mm (300 x 300 DPI)

Figure S4

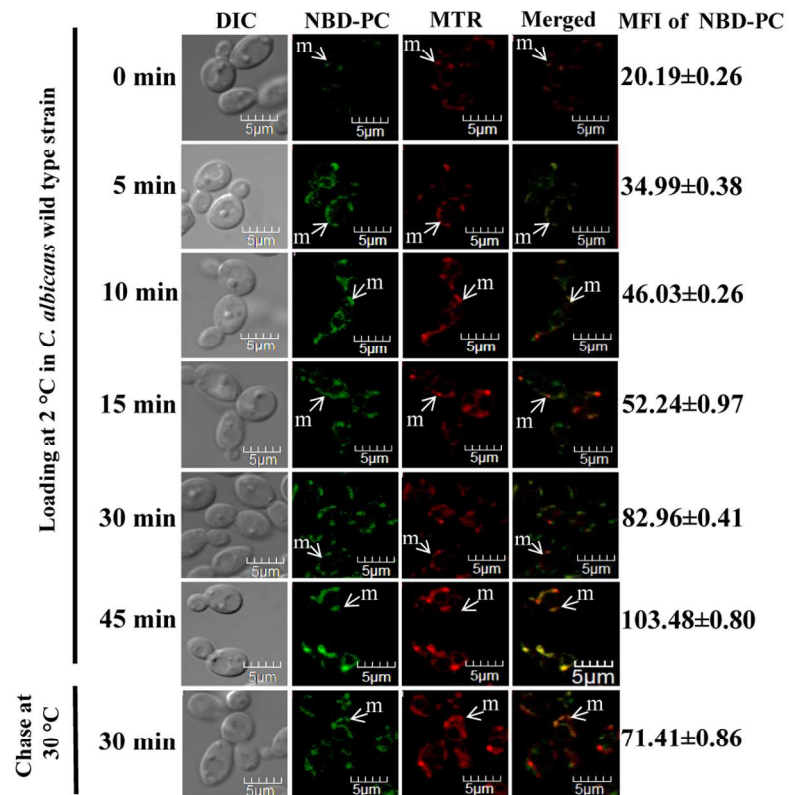

203x199mm (300 x 300 DPI)



Figure S5

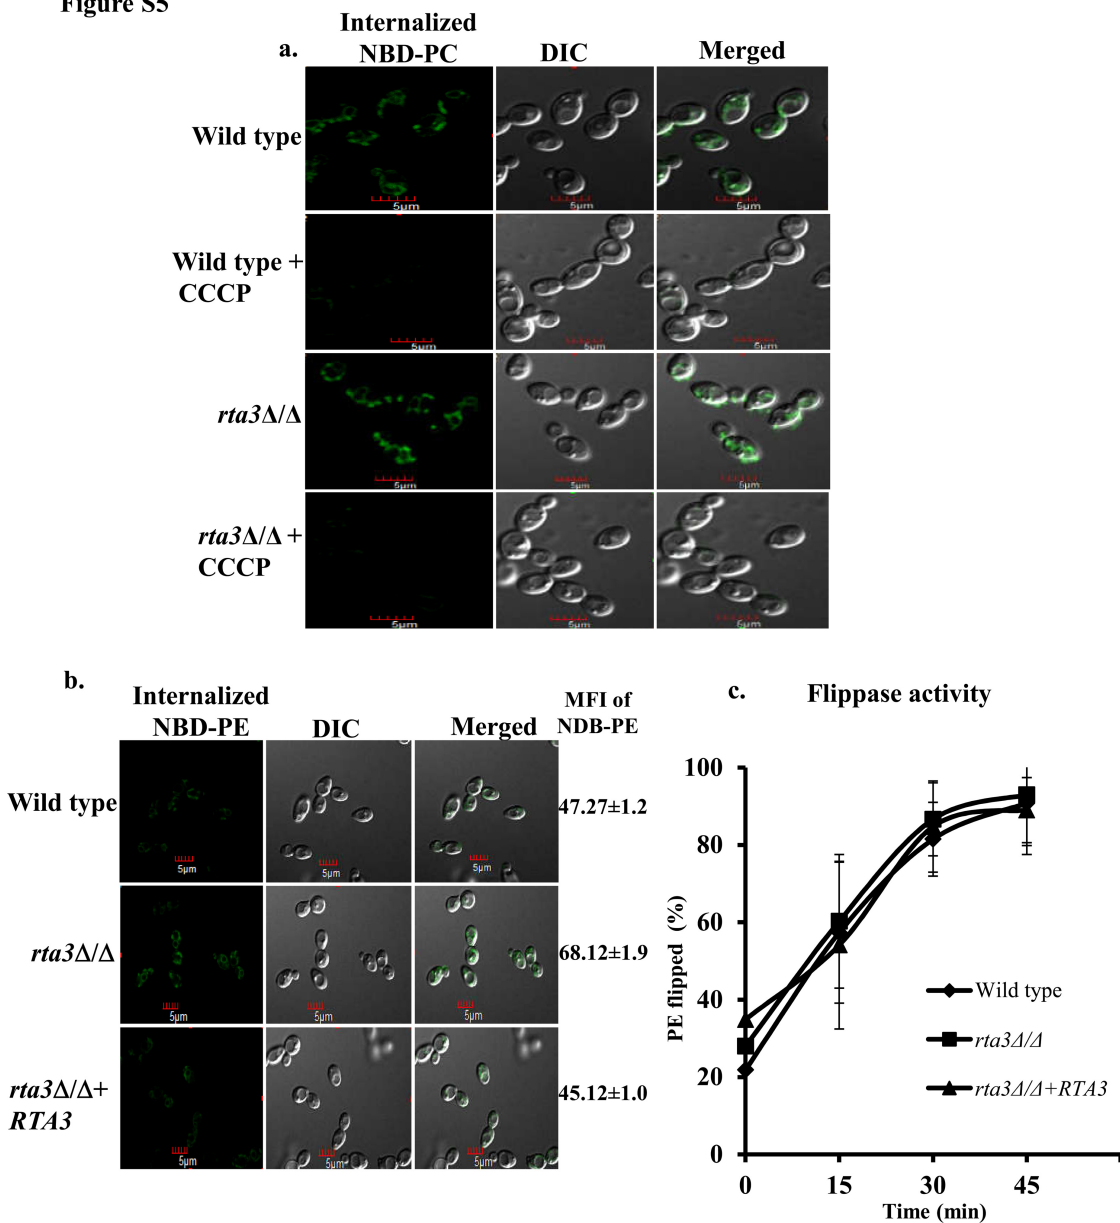

## In vitro biofilm formation

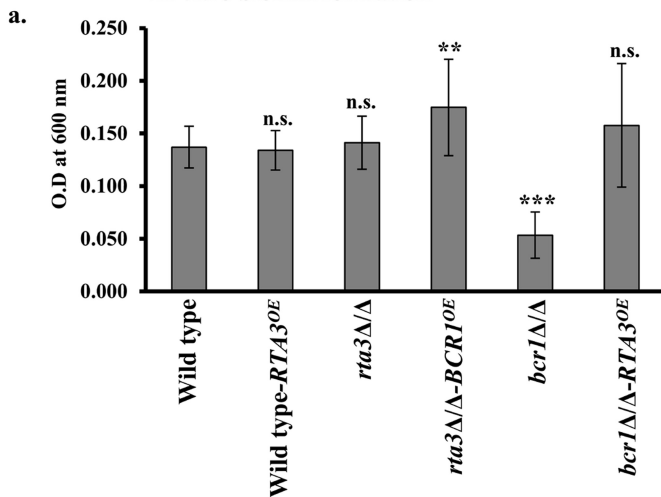

b.

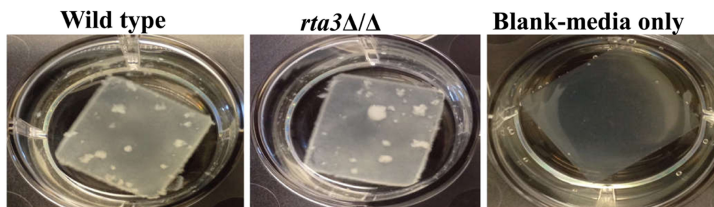

c.

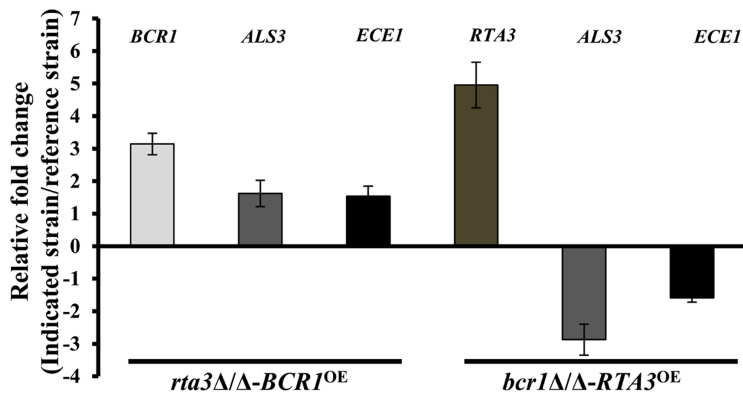

Figure S7

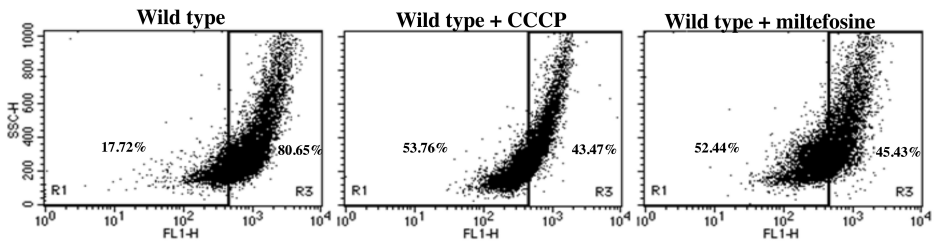

Table S1: Strains used in this study

| Strain         | Parent         | Genotype                                         | Source of reference             |
|----------------|----------------|--------------------------------------------------|---------------------------------|
| SC5314         |                | Wild type                                        | <i>Gillum AM, et al.</i> (1984) |
| AS10           | SC5314         | <i>RTA3/rta3Δ::SAT1-FLIP</i>                     | This study                      |
| AS11           | AS10           | <i>RTA3/rta3Δ::FRT</i>                           | This study                      |
| AS12           | AS11           | <i>rta3Δ::SAT1-FLIP/rta3Δ::FRT</i>               | This study                      |
| AS13           | AS12           | <i>rta3Δ::FRT/rta3Δ::FRT</i>                     | This study                      |
| AS14           | AS13           | <i>rta3Δ::FRT/rta3Δ::RTA3-SAT-FLIP</i>           | This study                      |
| AS15           | SC5314         | <i>RTA3-Myc-FRT-SAT1-FRT</i>                     | This study                      |
| AS16           | SC5314         | <i>RTA3-Myc-FRT</i>                              | This study                      |
| DSY2906        | CAF4-2         | <i>tac1Δ::hisG/tac1Δ::hisG</i>                   | <i>Coste et al.</i> (2004)      |
| DSY2926        | DSY2906        | <i>tac1Δ::hisG/tac1Δ::hisG LEU2::TAC1-2/URA3</i> | <i>Coste et al.</i> (2004)      |
| <i>bcr1Δ/Δ</i> | BWP17          | <i>bcr1Δ::ARG4/bcr1Δ::URA3</i>                   | Nobile <i>et al.</i> (2006)     |
| AS17           | <i>bcr1Δ/Δ</i> | <i>bcr1Δ/Δ -TDH3-RTA3::NAT1</i>                  | This study                      |
| AS18           | SC5314         | <i>SC5314-TDH3-RTA3::NAT1</i>                    | This study                      |
| AS19           | AS13           | <i>rta3Δ/Δ-TDH3-BCR1::NAT1</i>                   | This study                      |
| AS20           | SC5314         | <i>SC5314-TDH3-BCR1::NAT1</i>                    | This study                      |



TABLE S2 Plasmids used in this study

| Plasmid | Description                                                                                        | Source or reference         |
|---------|----------------------------------------------------------------------------------------------------|-----------------------------|
| pSFS2B  | <i>SAT1</i> flipper carrying nourseothricin resistance gene                                        | <i>Reuss O et al.</i> 2004. |
| pAS1    | pSFS2B flanked 5' and 3' <i>RTA3</i> <sup>NCR</sup> for disruption of first allele of <i>RTA3</i>  | This study                  |
| pAS2    | pSFS2B flanked 5' and 3' <i>RTA3</i> <sup>NCR</sup> for disruption of second allele of <i>RTA3</i> | This study                  |
| pAS3    | <i>RTA3</i> reconstitution construct                                                               | This study                  |
| pADH34  | C-terminal Myc tagging plasmid                                                                     | <i>Nobile et al.</i> (2009) |
| pCJN542 | <i>NAT1-TDH3</i> promoter plasmid                                                                  | <i>Nobile et al.</i> (2008) |

Table S3. Oligonucleotides used in this study

| Oligonucleotide  | Description                                                                                                | Sequence (5'→3')                                                                                     |
|------------------|------------------------------------------------------------------------------------------------------------|------------------------------------------------------------------------------------------------------|
| RTA3P1           | Forward primer for amplifying 5' <i>RTA3</i> NCR bearing Kpn1 site                                         | 5' -GGGGTACCTGAAATGACTTCATAATGCTCAT- 3'                                                              |
| RTA3P2           | Reverse primer for amplifying 5' <i>RTA3</i> NCR bearing Xho1 site                                         | 5' -CCGCTCGAGGAGCCTGTCTTTTTTTCAATATT- 3'                                                             |
| RTA3P3           | Forward primer for amplifying 3' <i>RTA3</i> <sup>NCR</sup> bearing Not1 site                              | 5' -ATTTGCGGCCGCATTTGAATGTAACTAAGG- 3'                                                               |
| RTA3P4           | Reverse primer for amplifying 3' <i>RTA3</i> <sup>NCR</sup> bearing SacII site                             | 5' -TCCCCGCGGGAAGGGTGGGAATGAACTG- 3'                                                                 |
| RTA3P5           | Forward primer for amplifying 3' <i>RTA3</i> <sup>ORF</sup> bearing Not1 site                              | 5' -ATTTGCGGCCGCAGTGTTTTCCATGTCGGTG- 3'                                                              |
| RTA3P6           | Reverse primer for amplifying 3' <i>RTA3</i> <sup>ORF</sup> bearing SacII site                             | 5' -TCCCCGCGGTTTCTTCATAACTTTTGTC- 3'                                                                 |
| RTA3P7           | Reverse primer for amplifying 5' <i>RTA3</i> <sup>NCR</sup> + <i>RTA3</i> <sup>ORF</sup> bearing Xho1 site | 5'-CTCGAGTCATTCCTTAT TCTCTTG-3'                                                                      |
| RTA3 mycF nostop | To amplify 65 bp <i>RTA3</i> ORF myc tag region                                                            | 5'-GAATCGACGTTGCAAGGTCAAATATTGTTAGGGGTG ATCCTATTCAAGAGAATAAGGAACGGATCCCCGGGTTA ATTAACGG-3'           |
| RTA3 mycR UTR    | To amplify 65 bp <i>RTA3</i> UTR myc tag region                                                            | 5'-ATAGCCACCTTTTTCACTTGCATTTAAGTTGCTAGGA ATCATACCACCCTTAGTTAACATTCAAATGGCGGCCG CTCTAGAAGTAGTGGATC-3' |
| DET RTA3F        | To detect <i>RTA3</i> myc construct integration                                                            | 5'-TGTTTTTATTATGTTGGCTTGTC-3'                                                                        |
| DET RTA3 R       | To detect <i>RTA3</i> myc construct integration                                                            | 5'-CGAAGATCTCTACAATAAGCC-3'                                                                          |
| AHO300           | To detect <i>RTA3</i> myc construct integration                                                            | 5'-CCGTTAATTAACCCGGGGATC-3'                                                                          |
| AHO301           | To detect <i>RTA3</i> myc construct integration                                                            | 5'-GGAACTTCAGATCCACTAGTTCTAGAGC-3'                                                                   |
| AHO302           | To detect <i>RTA3</i> myc construct integration                                                            | 5'-TCACTAGTGAATTCGCGCTCGAG-3'                                                                        |
| AHO283           | To detect <i>RTA3</i> myc                                                                                  | 5'- GGCGGCCGCTCTAGAAGTAGTGGATC-3'                                                                    |

|                                       |                                                                     |                                                                                                                                            |
|---------------------------------------|---------------------------------------------------------------------|--------------------------------------------------------------------------------------------------------------------------------------------|
|                                       | construct integration/amplicon sequencing                           |                                                                                                                                            |
| rta3myc(150bp upstream of stop codon) | To detect <i>RTA3</i> myc construct integration/amplicon sequencing | 5'-TCCACAAGTTGTAATGGGATCA-3'                                                                                                               |
| BCR1-F-OE-Ag-NAT-Ag-TEF1p             | Forward primer for <i>BCR1</i> <sup>OE</sup>                        | 5'-<br>AGGGTCATACTTGAATTATATTATATTAACCAAAC<br>ACACACACAGTAATAAGTTTTCTCCAGTGACAACTTTT<br>CACTTTACTCCCTCCTTTAATTTATCAAGCTTGCCTCG<br>TCCCC-3' |
| BCR1-R-OE-Ag-NAT-Ag-TDH3p             | Reverse primer for <i>BCR1</i> <sup>OE</sup>                        | 5'-GTGGTGGTGGATACATCATTGGTTGTCTTTGATTATA<br>AGCCATAGATGCGTGCTGTGATTGATGGGAATCGTTTT<br>GAAGTACTTGTGATGTCCTGACATATTTGAATTCAATT<br>GTGATG-3'  |
| RTA3-F-OE-Ag-NAT-Ag-TEF1p             | Forward primer for <i>RTA3</i> <sup>OE</sup>                        | 5'-ATAAGTTATTCCTAATCTGCTAAAAAA AAGAAACAT<br>GGTTACTCTTAGAATAGTTATAGATCCACACGGAAGTC<br>GGAAATTATGCACTGAATGTAAATCAAGCTTGCCTCGT<br>CCCC-3'    |
| RTA3-R-OE-Ag-NAT-Ag-TDH3p             | Reverse primer for <i>RTA3</i> <sup>OE</sup>                        | 5'-AAGCTGGGGCATAAGTTGCAGCAATGGTGGATAGAG<br>TTGTTGAAGTTGCAGTTGAGGTAGGAGTCCTTCTGTAA<br>TTACCGCAAGATCCATAGTATTCATATTTGAATTCAATT<br>G TGATG-3' |
| Nat-OE-R-det2-CJN                     | Detection primer for OE                                             | 5'- GAAACAACAACGAAACCAGC -3'                                                                                                               |
| BCR1-OE-F-det                         | Detection primer for OE                                             | 5'- CAGTAATAAGTTTTCTCCAGTGAC -3'                                                                                                           |
| RTA3-OE-F-det                         | Detection primer for OE                                             | 5'-CATGGTTACTCTTAGAATAGTTAT -3'                                                                                                            |

**Table S4. Oligonucleotides used for qPCR in this study**

|         |                                  |
|---------|----------------------------------|
| qACT1-F | 5'-GAAGCCCAATCCAAAAGA-3'         |
| qACT1-R | 5'-CTTCTGGAGCAACTCTCAATTC-3'     |
| qRTA3-F | 5'-TACAGAATGGACTCCTACCT-3'       |
| qRTA3-R | 5'-CCCGTACCATTTAATCGA-3'         |
| qALS1-F | 5'-GCAGTCGTCTGCAAAGTAAACCT-5'    |
| qALS1-R | 5'-CCGTTAGATCCGGCATCACT-3'       |
| qALS3-F | 5'-CCCCAACTTGGAATGCTGTT-3'       |
| qALS3-R | 5'-TGTATCTCCCGGACTTGCACTA-3'     |
| qBCR1-F | 5'-CGCCGACATTAACCAATGCT-3'       |
| qBCR1-R | 5'-CCGACGATTCAGCTGATGAA-3'       |
| qECE1-F | 5'-CATGACTTCTGTTGCTTCTACCAAGA-3' |
| qECE1-R | 5'-CAATCTGACGACGGCATTAGC-3'      |
| qHWP1-F | 5'-TGGTTCAGAACCATCCATGC-3'       |
| qHWP1-R | 5'-GGAATAGATGGTTGTGAACCAGC-3'    |
| qSOD5-F | 5'-TCACGCCAACAATGGTACCA -3'      |
| qSOD5-R | 5'-AAGGCAGCAATGACACCAAC -3'      |
| qUME6-F | 5'-TGGCTCCACTTACAAATCATAGTG-3'   |
| qUME6-R | 5'-CAATCCTAGTCCCAACTCCAGATC-3'   |

| ProbeName  | p Value | FC (absolu | Regulation | Alias      | Gene Name                                      | Gene Symbol |
|------------|---------|------------|------------|------------|------------------------------------------------|-------------|
| GT_Calbica | 0.03    | 1.61       | up         | orf19.9791 | Adenine deaminase; purine                      | AAH1        |
| GT_Calbica | 0.04    | 1.54       | up         | IPF3082.1  | Protein similar to a region o                  | ACB1        |
| GT_Calbica | 0.03    | 2.00       | down       | orf19.1322 | NAD-aldehyde dehydrogena                       | ALD5        |
| GT_Calbica | 0.01    | 2.43       | down       | orf19.8361 | Putative aldehyde dehydrog                     | ALD6        |
| GT_Calbica | 0.02    | 7.27       | down       | orf19.9379 | Cell wall adhesin; epithelial                  | ALS3        |
| GT_Calbica | 0.03    | 1.68       | up         | orf19.1036 | Aquaporin water channel; o                     | AQY1        |
| GT_Calbica | 0.02    | 8.44       | down       | AFF2 CaO   | Putative fungal-specific tran                  | ATO1        |
| GT_Calbica | 0.00    | 2.90       | down       | orf19.1113 | Copper transporter; transcri                   | CTR1        |
| GT_Calbica | 0.01    | 1.64       | up         | orf19.1290 | Putative allantoinase; trans                   | DAL1        |
| GT_Calbica | 0.01    | 22.23      | down       | orf19.1088 | Hypha-specific protein; regu                   | ECE1        |
| GT_Calbica | 0.04    | 1.78       | down       | orf19.1169 | Multicopper ferroxidase; ind                   | FET34       |
| GT_Calbica | 0.01    | 1.71       | down       | orf19.8477 | Protein with a monooxygen                      | FMO2        |
| GT_Calbica | 0.01    | 1.80       | down       | orf19.8991 | Major cell-surface ferric red                  | FRE10       |
| GT_Calbica | 0.03    | 2.89       | down       | orf19.1355 | Copper-regulated cupric red                    | FRE7        |
| GT_Calbica | 0.01    | 2.17       | down       | IPF868.1 C | High-affinity iron permease;                   | FTR1        |
| GT_Calbica | 0.03    | 2.08       | down       | orf6.7739  | General amino acid permea                      | GAP2        |
| GT_Calbica | 0.00    | 1.84       | up         | orf19.9325 | Glycerol-3-phosphate dehyd                     | GPD1        |
| GT_Calbica | 0.01    | 1.68       | up         | orf19.8310 | Surface protein similar to gl                  | GPD2        |
| GT_Calbica | 0.04    | 1.72       | up         | orf19.7992 | Ortholog(s) have glutathion                    | GTT12       |
| GT_Calbica | 0.03    | 9.45       | down       | orf19.1301 | 3-hydroxypropionate dehyd                      | HPD1        |
| GT_Calbica | 0.02    | 19.98      | down       | orf19.8901 | Hyphal cell wall protein; hos                  | HWP1        |
| GT_Calbica | 0.03    | 1.64       | down       | orf19.1244 | GPI-anchored hyphal cell wa                    | HYR1        |
| GT_Calbica | 0.02    | 1.93       | up         | orf19.1322 | Putative hydantoin utilizatio                  | HYU1        |
| GT_Calbica | 0.02    | 2.53       | up         | orf19.1253 | Putative protein kinase; role                  | IRE1        |
| GT_Calbica | 0.03    | 1.55       | down       | IPF492.1 C | Copper fist transcription fac                  | MAC1        |
| GT_Calbica | 0.03    | 1.90       | down       | orf19.1146 | Putative high-affinity maltos                  | MAL31       |
| GT_Calbica | 0.04    | 1.53       | down       | IPF2363.1  | Transcription factor; regulat                  | MCM1        |
| GT_Calbica | 0.04    | 1.85       | up         | IPF2441.1  | Putative protein constituent                   | NSA2        |
| GT_Calbica | 0.02    | 1.50       | up         | orf6.8731  | Neutral trehalase; hyphal in                   | NTH1        |
| GT_Calbica | 0.00    | 1.78       | down       | CaO19.260  | Oligopeptide transporter; tr                   | OPT1        |
| GT_Calbica | 0.01    | 2.21       | down       | orf19.1311 | Putative oligopeptide transp                   | OPT7        |
| GT_Calbica | 0.04    | 1.67       | down       | orf19.1011 | Probable pseudogene simila                     | OPT9        |
| GT_Calbica | 0.01    | 1.53       | down       | orf19.1064 | NAD(P)H oxidoreductase far                     | OYE32       |
| GT_Calbica | 0.00    | 4.35       | down       | orf19.1377 | GPI-anchored cell wall prote                   | PGA13       |
| GT_Calbica | 0.01    | 1.69       | down       | orf19.1122 | Putative GPI-anchored prote                    | PGA23       |
| GT_Calbica | 0.04    | 1.63       | down       | orf19.1264 | Thioredoxin peroxidase; tra                    | PRX1        |
| GT_Calbica | 0.02    | 1.56       | down       | CaO19.140  | Putative peptidyl-prolyl cis/                  | RRD1        |
| GT_Calbica | 0.04    | 1.84       | up         | orf19.7691 | Putative serine/threonine-p                    | RTS1        |
| GT_Calbica | 0.04    | 2.16       | down       | orf19.1303 | Secreted aspartyl proteinase                   | SAP5        |
| GT_Calbica | 0.00    | 2.10       | down       | orf19.8319 | Protein with similarity to pe                  | SEO1        |
| GT_Calbica | 0.00    | 1.62       | down       | orf19.1141 | Putative succinate-fumarate                    | SFC1        |
| GT_Calbica | 0.01    | 6.58       | down       | orf19.9607 | Cu and Zn-containing super                     | SOD5        |
| GT_Calbica | 0.04    | 2.25       | up         | orf19.1107 | DNA endonuclease; require                      | SPO11       |
| GT_Calbica | 0.04    | 1.55       | down       | orf19.8421 | Putative GABA transaminase                     | UGA1        |
| GT_Calbica | 0.03    | 4.06       | down       | orf19.9381 | Zn(II)2Cys6 transcription fac                  | UME6        |
| GT_Calbica | 0.01    | 1.50       | down       | CaO19.132  | Predicted amino acid transmembrane transporter |             |

|            |      |      |      |            |                                                            |
|------------|------|------|------|------------|------------------------------------------------------------|
| GT_Calbica | 0.04 | 1.52 | down | IPF18710.1 | Dubious open reading frame                                 |
| GT_Calbica | 0.03 | 1.52 | down | 0          | Ortholog of <i>Candida tropicalis</i> MYA-3404 : CTRG_     |
| GT_Calbica | 0.01 | 1.52 | down | orf19.1263 | Ortholog(s) have cytosol, nucleus localization             |
| GT_Calbica | 0.01 | 1.53 | down | orf19.9363 | D-arabinose 5-phosphate isomerase; has GutQ do             |
| GT_Calbica | 0.02 | 1.54 | down | IPF13883.1 | Ortholog of <i>C. dubliniensis</i> CD36 : Cd36_73420, D    |
| GT_Calbica | 0.05 | 1.56 | up   | IPF27310.1 | Ortholog of <i>Candida albicans</i> WO-1 : CAWG_0287       |
| GT_Calbica | 0.01 | 1.57 | down | orf19.8714 | Protein similar to <i>Candida boidinii</i> formate dehyd   |
| GT_Calbica | 0.02 | 1.57 | up   | orf19.1024 | Putative plasma membrane protein; Plc1-regulate            |
| GT_Calbica | 0.03 | 1.59 | down | orf19.8751 | Protein similar to <i>A. nidulans</i> CysA serine O-trans- |
| GT_Calbica | 0.02 | 1.61 | up   | CaO19.108  | Ortholog of <i>C. parapsilosis</i> CDC317 : CPAR2_6011     |
| GT_Calbica | 0.03 | 1.61 | down | CaO19.126  | Ortholog of <i>Candida albicans</i> WO-1 : CAWG_0564       |
| GT_Calbica | 0.04 | 1.61 | down | orf19.1388 | Similar to bacterial DnaJ; transcript upregulated in       |
| GT_Calbica | 0.02 | 1.61 | down | orf19.1056 | Ortholog(s) have protein kinase activity, role in ac       |
| GT_Calbica | 0.01 | 1.62 | down | orf19.9176 | Ortholog(s) have cytosol, nucleus localization             |
| GT_Calbica | 0.01 | 1.63 | down | TCD2 CaO   | <i>S. pombe</i> ortholog SPBC460.04c is a predicted sul    |
| GT_Calbica | 0.05 | 1.64 | down | IPF2232.1  | Putative oxidoreductase; mutation confers hypers           |
| GT_Calbica | 0.04 | 1.65 | down | IPF1286.1  | Has domain(s) with predicted nucleic acid binding          |
| GT_Calbica | 0.01 | 1.65 | down | orf19.8043 | Protein of unknown function; induced by Sfu1; Sp           |
| GT_Calbica | 0.01 | 1.65 | up   | orf19.1357 | Ortholog of <i>C. dubliniensis</i> CD36 : Cd36_06640, C    |
| GT_Calbica | 0.02 | 1.71 | down | orf19.8351 | Possible dehydrogenase; flow model biofilm induc           |
| GT_Calbica | 0.00 | 1.71 | up   | LPF44 CaO  | Protein of unknown function; Hap43-repressed ge            |
| GT_Calbica | 0.03 | 1.73 | up   | CaO19.856  | Protein of unknown function; transcript repressed          |
| GT_Calbica | 0.05 | 1.74 | down | orf19.1398 | Protein of unknown function; expression decrease           |
| GT_Calbica | 0.04 | 1.75 | down | 0          | Predicted ORF in retrotransposon Tca16 with simi           |
| GT_Calbica | 0.02 | 1.76 | up   | CaO19.191  | Protein of unknown function; Spider biofilm repre          |
| GT_Calbica | 0.02 | 1.78 | down | orf19.8762 | Putative DnaJ-like molecular chaperone; Spider bi          |
| GT_Calbica | 0.00 | 1.80 | up   | orf19.1088 | Putative protein of unknown function; transcript v         |
| GT_Calbica | 0.04 | 1.82 | up   | IPF27469.1 | Dubious open reading frame                                 |
| GT_Calbica | 0.05 | 1.84 | up   | IPF21763.1 | Ortholog of <i>Candida albicans</i> WO-1 : CAWG_0235       |
| GT_Calbica | 0.04 | 1.91 | down | orf19.1193 | Predicted heme-binding stress-related protein; Tr          |
| GT_Calbica | 0.04 | 1.93 | up   | IPF2138.1  | Ortholog(s) have TRC complex, nucleus localizatio          |
| GT_Calbica | 0.03 | 1.94 | down | orf19.1096 | Protein of unknown function; oxidative stress-ind          |
| GT_Calbica | 0.01 | 1.96 | down | orf19.1116 | Putative oxidoreductase; Spider biofilm induced            |
| GT_Calbica | 0.04 | 2.03 | down | 0          | Protein of unknown function; Spider biofilm induc          |
| GT_Calbica | 0.00 | 2.05 | up   | orf19.1381 | Ortholog of <i>C. dubliniensis</i> CD36 : Cd36_72300, C    |
| GT_Calbica | 0.02 | 2.09 | down | orf6.8476  | Putative ferric reductase; induced by Mac1 under           |
| GT_Calbica | 0.03 | 2.10 | up   | IPF29232.1 | Dubious open reading frame                                 |
| GT_Calbica | 0.03 | 2.11 | down | orf19.1365 | Has domain(s) with predicted phosphatidylinosito           |
| GT_Calbica | 0.03 | 2.11 | down | orf19.9714 | Putative sterol deacetylase; flow model biofilm in         |
| GT_Calbica | 0.01 | 2.12 | up   | IPF28792.1 | Ortholog of <i>Candida albicans</i> WO-1 : CAWG_0346       |
| GT_Calbica | 0.05 | 2.13 | up   | orf19.9113 | Protein of unknown function; F-12/CO2 early biof           |
| GT_Calbica | 0.00 | 2.13 | up   | IPF5225.1  | Ortholog of <i>Candida albicans</i> WO-1 : CAWG_0000       |
| GT_Calbica | 0.04 | 2.15 | up   | orf19.9338 | Ortholog(s) have G-protein beta/gamma-subunit              |
| GT_Calbica | 0.04 | 2.19 | down | IPF26615.1 | Protein of unknown function; hypoxia, Hap43-rep            |
| GT_Calbica | 0.03 | 2.20 | down | IPF26615.1 | Protein of unknown function; hypoxia, Hap43-rep            |
| GT_Calbica | 0.01 | 2.21 | up   | orf19.1328 | Ortholog of <i>C. dubliniensis</i> CD36 : Cd36_84160, C    |
| GT_Calbica | 0.05 | 2.21 | up   | orf19.8216 | Has domain(s) with predicted heme binding, pero            |

|            |      |      |      |            |                                                            |
|------------|------|------|------|------------|------------------------------------------------------------|
| GT_Calbica | 0.05 | 2.25 | down | IPF27249.1 | Ortholog of Candida albicans WO-1 : CAWG_0224              |
| GT_Calbica | 0.01 | 2.31 | up   | orf19.1353 | Protein of unknown function; transcript detected           |
| GT_Calbica | 0.04 | 2.31 | down | IPF26615.1 | Protein of unknown function; hypoxia, Hap43-rep            |
| GT_Calbica | 0.01 | 2.41 | up   | orf19.1292 | Protein of unknown function; induced by Mnl1 un            |
| GT_Calbica | 0.02 | 2.41 | down | orf19.1221 | Protein of unknown function; hyphal-induced exp            |
| GT_Calbica | 0.05 | 2.42 | up   | orf19.1149 | Similar to <i>S. pombe</i> mug180, a predicted esterase    |
| GT_Calbica | 0.01 | 2.46 | up   | IPF23870.1 | Putative mitochondrial phosphatidylglycerophosp            |
| GT_Calbica | 0.02 | 2.49 | up   | IPF5217.1  | Protein of unknown function; Spider biofilm repre          |
| GT_Calbica | 0.01 | 2.52 | up   | orf19.1073 | Putative rRNA processing protein; Spider biofilm i         |
| GT_Calbica | 0.00 | 2.73 | up   | orf19.1242 | Ortholog(s) have spermine synthase activity, role          |
| GT_Calbica | 0.04 | 2.74 | up   | IPF29760.1 | Dubious open reading frame                                 |
| GT_Calbica | 0.01 | 2.79 | up   | orf19.1153 | Protein similar to <i>S. cerevisiae</i> Ybr075wp; transpo  |
| GT_Calbica | 0.04 | 2.79 | up   | CaO19.184  | Predicted lipid-binding ER protein; involved in ER-        |
| GT_Calbica | 0.00 | 2.88 | up   | orf19.1351 | Cardiolipin synthase; ortholog of <i>S. cerevisiae</i> Crd |
| GT_Calbica | 0.01 | 2.94 | down | orf19.8411 | Ortholog(s) have protein serine/threonine kinase           |
| GT_Calbica | 0.04 | 2.98 | down | 0          | Protein of unknown function; Spider biofilm induc          |
| GT_Calbica | 0.02 | 2.98 | up   | orf19.1353 | Protein of unknown function; transcript detected           |
| GT_Calbica | 0.01 | 3.18 | up   | IPF5228.1  | Putative zinc-finger domain protein with a predict         |
| GT_Calbica | 0.01 | 3.67 | up   | 0          | ORF added to Assembly 21 based on comparative              |
| GT_Calbica | 0.00 | 4.48 | down | orf19.1408 | Protein of unknown function; Sef1, Sfu1, and Hap           |
| GT_Calbica | 0.00 | 4.98 | up   | IPF5661.2  | Protein of unknown function; Spider biofilm repre          |
| GT_Calbica | 0.01 | 5.21 | up   | IPF26207.1 | Protein of unknown function                                |

| Gene Type           | ORF_ID       |  |  |  |  |  |  |
|---------------------|--------------|--|--|--|--|--|--|
| ORF Verified        | orf19.2251   |  |  |  |  |  |  |
| ORF Uncharacterized | orf19.7043.1 |  |  |  |  |  |  |
| ORF Uncharacterized | orf19.5806   |  |  |  |  |  |  |
| ORF Uncharacterized | orf19.742    |  |  |  |  |  |  |
| ORF Verified        | orf19.1816   |  |  |  |  |  |  |
| ORF Verified        | orf19.2849   |  |  |  |  |  |  |
| ORF Uncharacterized | orf19.6169   |  |  |  |  |  |  |
| ORF Verified        | orf19.3646   |  |  |  |  |  |  |
| ORF Uncharacterized | orf19.5454   |  |  |  |  |  |  |
| ORF Verified        | orf19.3374   |  |  |  |  |  |  |
| ORF Verified        | orf19.4215   |  |  |  |  |  |  |
| ORF Uncharacterized | orf19.857    |  |  |  |  |  |  |
| ORF Verified        | orf19.1415   |  |  |  |  |  |  |
| ORF Verified        | orf19.6139   |  |  |  |  |  |  |
| ORF Verified        | orf19.7219   |  |  |  |  |  |  |
| ORF Verified        | orf19.6993   |  |  |  |  |  |  |
| ORF Verified        | orf19.1756   |  |  |  |  |  |  |
| ORF Verified        | orf19.691    |  |  |  |  |  |  |
| ORF Uncharacterized | orf19.359    |  |  |  |  |  |  |
| ORF Verified        | orf19.5565   |  |  |  |  |  |  |
| ORF Verified        | orf19.1321   |  |  |  |  |  |  |
| ORF Verified        | orf19.4975   |  |  |  |  |  |  |
| ORF Uncharacterized | orf19.5804   |  |  |  |  |  |  |
| ORF Verified        | orf19.5068   |  |  |  |  |  |  |
| ORF Verified        | orf19.7068   |  |  |  |  |  |  |
| ORF Uncharacterized | orf19.3981   |  |  |  |  |  |  |
| ORF Verified        | orf19.7025   |  |  |  |  |  |  |
| ORF Uncharacterized | orf19.7424   |  |  |  |  |  |  |
| ORF Verified        | orf19.7479   |  |  |  |  |  |  |
| ORF Verified        | orf19.2602   |  |  |  |  |  |  |
| ORF Verified        | orf19.5673   |  |  |  |  |  |  |
| pseudogene          | orf19.2584   |  |  |  |  |  |  |
| ORF Verified        | orf19.3131   |  |  |  |  |  |  |
| ORF Verified        | orf19.6420   |  |  |  |  |  |  |
| ORF Verified        | orf19.3740   |  |  |  |  |  |  |
| ORF Verified        | orf19.5180   |  |  |  |  |  |  |
| ORF Uncharacterized | orf19.6792   |  |  |  |  |  |  |
| ORF Uncharacterized | orf19.20     |  |  |  |  |  |  |
| ORF Verified        | orf19.5585   |  |  |  |  |  |  |
| ORF Uncharacterized | orf19.700    |  |  |  |  |  |  |
| ORF Verified        | orf19.3931   |  |  |  |  |  |  |
| ORF Verified        | orf19.2060   |  |  |  |  |  |  |
| ORF Verified        | orf19.3589   |  |  |  |  |  |  |
| ORF Uncharacterized | orf19.802    |  |  |  |  |  |  |
| ORF Verified        | orf19.1822   |  |  |  |  |  |  |
| ORF Uncharacterized | orf19.5826   |  |  |  |  |  |  |



|                         |              |  |  |  |  |  |  |
|-------------------------|--------------|--|--|--|--|--|--|
| ORF Dubious             | orf19.4196   |  |  |  |  |  |  |
| ORF Uncharacterized     | orf19.2018.2 |  |  |  |  |  |  |
| ORF Uncharacterized     | orf19.5169   |  |  |  |  |  |  |
| ORF Uncharacterized     | orf19.1797   |  |  |  |  |  |  |
| ORF Uncharacterized     | orf19.5502   |  |  |  |  |  |  |
| ORF Dubious             | orf19.7348   |  |  |  |  |  |  |
| ORF Uncharacterized     | orf19.1117   |  |  |  |  |  |  |
| ORF Uncharacterized     | orf19.2726   |  |  |  |  |  |  |
| ORF Uncharacterized     | orf19.1159   |  |  |  |  |  |  |
| ORF Uncharacterized     | orf19.1087   |  |  |  |  |  |  |
| ORF Uncharacterized     | orf19.5141   |  |  |  |  |  |  |
| ORF Uncharacterized     | orf19.6530   |  |  |  |  |  |  |
| ORF Uncharacterized     | orf19.3049   |  |  |  |  |  |  |
| ORF Uncharacterized     | orf19.1608   |  |  |  |  |  |  |
| ORF Uncharacterized     | orf19.6398   |  |  |  |  |  |  |
| ORF Verified            | orf19.6899   |  |  |  |  |  |  |
| ORF Uncharacterized     | orf19.7380   |  |  |  |  |  |  |
| ORF Uncharacterized     | orf19.413    |  |  |  |  |  |  |
| ORF Uncharacterized     | orf19.6194   |  |  |  |  |  |  |
| ORF Uncharacterized     | orf19.732    |  |  |  |  |  |  |
| ORF Uncharacterized     | orf19.6704   |  |  |  |  |  |  |
| ORF Uncharacterized     | orf19.951    |  |  |  |  |  |  |
| ORF Uncharacterized     | orf19.6688   |  |  |  |  |  |  |
| ORF Uncharacterized tra | orf19.1490.1 |  |  |  |  |  |  |
| ORF Uncharacterized     | orf19.1917   |  |  |  |  |  |  |
| ORF Uncharacterized     | orf19.1169   |  |  |  |  |  |  |
| ORF Uncharacterized     | orf19.3373   |  |  |  |  |  |  |
| ORF Dubious             | orf19.5284   |  |  |  |  |  |  |
| ORF Uncharacterized     | orf19.5461   |  |  |  |  |  |  |
| ORF Verified            | orf19.4459   |  |  |  |  |  |  |
| ORF Uncharacterized     | orf19.7199   |  |  |  |  |  |  |
| ORF Uncharacterized     | orf19.3461   |  |  |  |  |  |  |
| ORF Uncharacterized     | orf19.3684   |  |  |  |  |  |  |
| ORF Uncharacterized     | orf19.1409.2 |  |  |  |  |  |  |
| ORF Uncharacterized     | orf19.6453   |  |  |  |  |  |  |
| ORF Verified            | orf19.7077   |  |  |  |  |  |  |
| ORF Dubious             | orf19.2025   |  |  |  |  |  |  |
| ORF Uncharacterized     | orf19.6277   |  |  |  |  |  |  |
| ORF Uncharacterized     | orf19.2168   |  |  |  |  |  |  |
| ORF Dubious             | orf19.3368   |  |  |  |  |  |  |
| ORF Uncharacterized     | orf19.1539   |  |  |  |  |  |  |
| ORF Uncharacterized     | orf19.7266   |  |  |  |  |  |  |
| ORF Uncharacterized     | orf19.1769   |  |  |  |  |  |  |
| ORF Uncharacterized     | orf19.670.2  |  |  |  |  |  |  |
| ORF Uncharacterized     | orf19.670.2  |  |  |  |  |  |  |
| ORF Uncharacterized     | orf19.5863   |  |  |  |  |  |  |
| ORF Uncharacterized     | orf19.584    |  |  |  |  |  |  |

|                     |              |  |  |  |  |  |  |
|---------------------|--------------|--|--|--|--|--|--|
| ORF Dubious         | orf19.7555   |  |  |  |  |  |  |
| ORF Uncharacterized | orf19.6114   |  |  |  |  |  |  |
| ORF Uncharacterized | orf19.670.2  |  |  |  |  |  |  |
| ORF Uncharacterized | orf19.5474   |  |  |  |  |  |  |
| ORF Uncharacterized | orf19.4749   |  |  |  |  |  |  |
| ORF Uncharacterized | orf19.4011   |  |  |  |  |  |  |
| ORF Uncharacterized | orf19.3449.2 |  |  |  |  |  |  |
| ORF Uncharacterized | orf19.7270   |  |  |  |  |  |  |
| ORF Uncharacterized | orf19.3220   |  |  |  |  |  |  |
| ORF Uncharacterized | orf19.4960   |  |  |  |  |  |  |
| ORF Dubious         | orf19.653    |  |  |  |  |  |  |
| ORF Verified        | orf19.4055   |  |  |  |  |  |  |
| ORF Uncharacterized | orf19.1840   |  |  |  |  |  |  |
| ORF Uncharacterized | orf19.6100   |  |  |  |  |  |  |
| ORF Uncharacterized | orf19.792    |  |  |  |  |  |  |
| ORF Uncharacterized | orf19.7279.1 |  |  |  |  |  |  |
| ORF Uncharacterized | orf19.6113   |  |  |  |  |  |  |
| ORF Uncharacterized | orf19.7265   |  |  |  |  |  |  |
| ORF Uncharacterized | orf19.3059.1 |  |  |  |  |  |  |
| ORF Uncharacterized | orf19.6793   |  |  |  |  |  |  |
| ORF Uncharacterized | orf19.7125   |  |  |  |  |  |  |
| ORF Uncharacterized | orf19.1105.3 |  |  |  |  |  |  |
